# Supplementary material for: TL1A is an epithelial alarmin that cooperates with IL-33 for initiation of allergic airway inflammation
Source: PubMed Central journal article supplement (PMC11010340; doi:10.1084/jem.20231236), 2024-04-10

SourceData Fig 6C

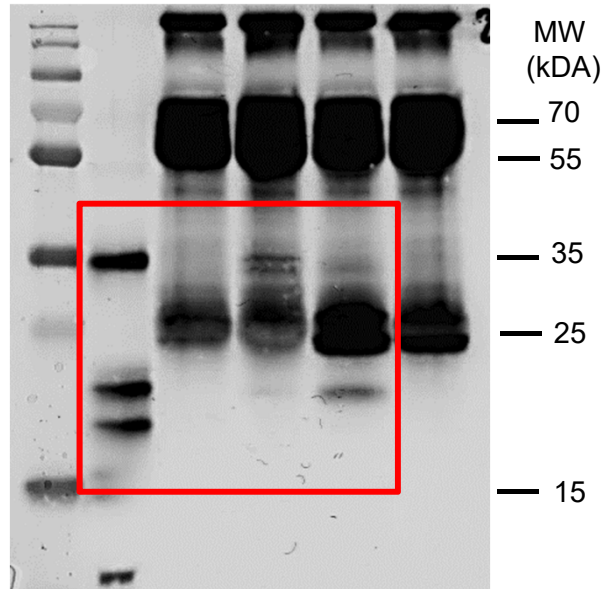

SourceData Fig 6D

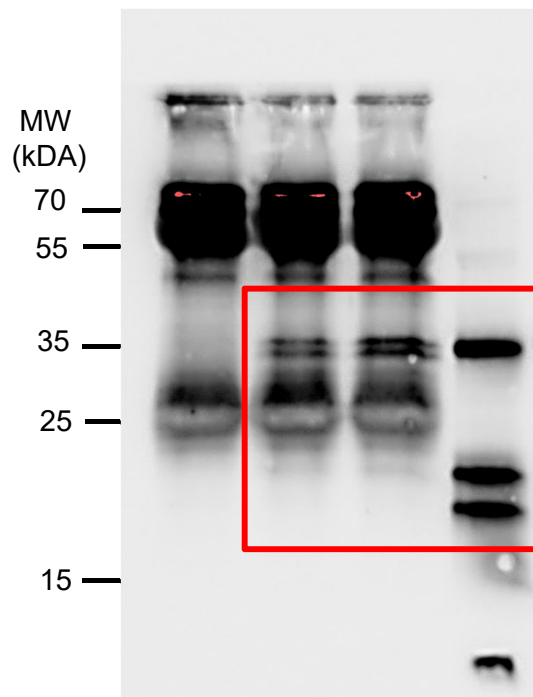

Supplement: JEM_20231236_SourceDataF6.pdf [file JEM_20231236_SourceDataF6.pdf]
