# Supplementary material for: TL1A is an epithelial alarmin that cooperates with IL-33 for initiation of allergic airway inflammation
Source: PubMed Central journal article supplement (PMC11010340; doi:10.1084/jem.20231236), 2024-04-10

Source Data Fig S3E

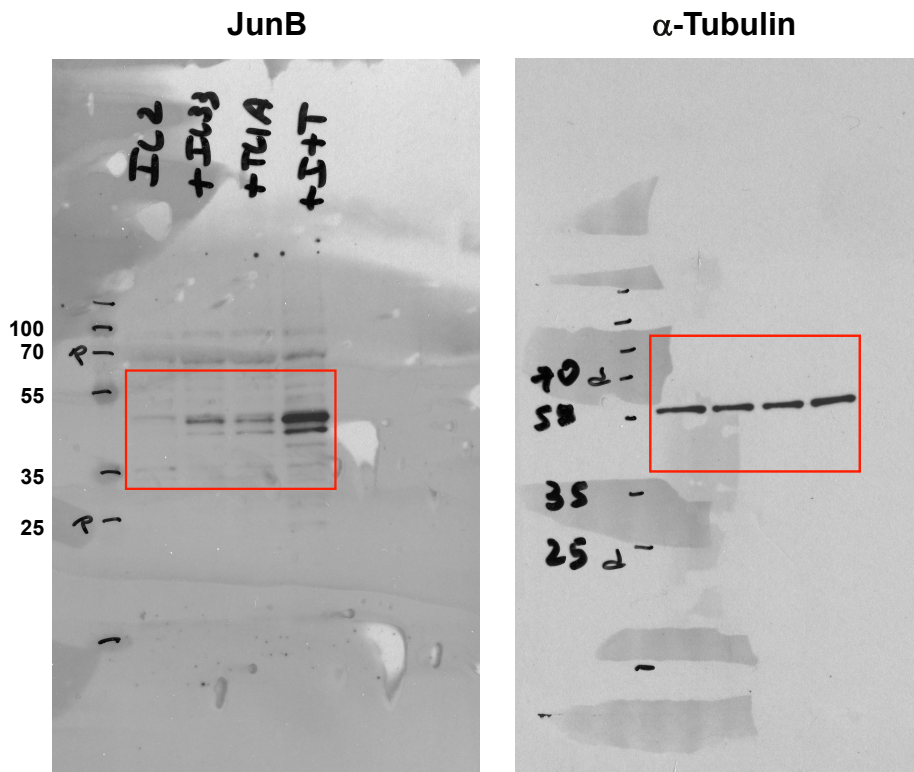

Supplement: JEM_20231236_SourceDataFS3.pdf [file JEM_20231236_SourceDataFS3.pdf]
